# Supplementary material for: Circulating renalase predicts all-cause mortality and renal outcomes in patients with advanced chronic kidney disease
Source: PubMed Central journal article supplement — Korean J Intern Med. 2017 Nov 29;34(4):858–66. doi: 10.3904/kjim.2017.058 (PMC6610203; doi:10.3904/kjim.2017.058), 2017-11-29
Supplement: kjim-2017-058-suppl1.pdf [file kjim-2017-058-suppl1.pdf]

**Supplementary Table 1. Baseline characteristics at initiation of study**

| Characteristic                     | Number | Value        |
|------------------------------------|--------|--------------|
| Age, yr                            | 383    | 56.4 ± 13.1  |
| Male sex                           | 383    | 252 (65.8)   |
| ESRD cause                         | 383    |              |
| Diabetic                           |        | 162 (47.1)   |
| Non-diabetic                       |        | 182 (52.9)   |
| Body mass index, kg/m <sup>2</sup> | 383    | 24.6 ± 3.6   |
| Systolic blood pressure, mmHg      | 382    | 129.5 ± 14.6 |
| Diastolic blood pressure, mmHg     | 382    | 75.7 ± 9.9   |
| Serum Cr, mg/dL                    | 383    | 2.82 ± 0.67  |
| eGFR, mL/min/1.73 m <sup>2</sup>   | 383    | 26.84 ± 7.19 |
| Urinary protein, g/g Cr            | 375    | 2.11 ± 2.32  |
| Hemoglobin, g/dL                   | 382    | 11.4 ± 1.8   |
| Albumin, g/dL                      | 379    | 3.99 ± 0.45  |
| Uric acid, mg/dL                   | 382    | 8.34 ± 1.88  |
| LDL, mg/dL                         | 327    | 92.4 ± 34.6  |
| C-reactive protein, mg/dL          | 365    | 0.67 ± 2.71  |
| Renalase, µg/mL                    | 383    | 75.8 ± 34.8  |

Values are presented as mean ± SD or number (%).

ESRD, end stage renal disease; Cr, creatinine; eGFR, estimated glomerular filtration rate; LDL, low density lipoprotein.
