# Supplementary material for: Circulating renalase predicts all-cause mortality and renal outcomes in patients with advanced chronic kidney disease
Source: PubMed Central journal article supplement — Korean J Intern Med. 2017 Nov 29;34(4):858–66. doi: 10.3904/kjim.2017.058 (PMC6610203; doi:10.3904/kjim.2017.058), 2017-11-29
Supplement: kjim-2017-058-suppl2.pdf [file kjim-2017-058-suppl2.pdf]

**Supplementary Table 2. Baseline characteristics of patients according to the occurrence of death in 383 patients**

| Variable                         | No death (n = 358) | Death (n = 25) | p value |
|----------------------------------|--------------------|----------------|---------|
| Age, yr                          | 55.8 ± 13.0        | 65.9 ± 10.7    | < 0.001 |
| Male sex                         | 236 (65.9)         | 16 (64.0)      | 0.830   |
| ESRD cause                       |                    |                |         |
| Diabetic                         | 178 (49.7)         | 17 (68.0)      | 0.098   |
| BMI, kg/m <sup>2</sup>           | 24.7 ± 3.7         | 23.9 ± 2.6     | 0.285   |
| SBP, mmHg                        | 129.2 ± 14.5       | 133.2 ± 16.0   | 0.199   |
| DBP, mmHg                        | 75.5 ± 10.0        | 78.0 ± 8.1     | 0.242   |
| Serum Cr, mg/dL                  | 2.80 ± 0.66        | 3.00 ± 0.79    | 0.163   |
| eGFR, mL/min/1.73 m <sup>2</sup> | 27.15 ± 7.12       | 22.24 ± 6.60   | 0.001   |
| Urinary protein, g/g Cr          | 2.12 ± 2.34        | 1.88 ± 2.11    | 0.617   |
| Hemoglobin, g/dL                 | 11.4 ± 1.7         | 10.4 ± 1.7     | 0.005   |
| Albumin, g/dL                    | 4.0 ± 0.4          | 3.9 ± 0.5      | 0.243   |
| Uric acid, mg/dL                 | 8.4 ± 1.9          | 8.0 ± 1.9      | 0.396   |
| LDL, mg/dL                       | 92.5 ± 35.5        | 91.2 ± 20.2    | 0.852   |
| CRP, mg/dL                       | 0.68 ± 2.80        | 0.52 ± 0.96    | 0.788   |
| Calcium, mg/dL                   | 8.87 ± 0.57        | 8.78 ± 0.74    | 0.476   |
| Phosphorous, mg/dL               | 3.89 ± 0.73        | 3.88 ± 0.83    | 0.962   |
| Renalase, µg/mL                  | 74.7 ± 34.2        | 92.4 ± 40.3    | 0.014   |
| Follow-up period, mon            | 57.8 ± 14.8        | 34.2 ± 17.4    | 0.004   |

Values are presented as mean ± SD or number (%).

ESRD, end stage renal disease; BMI, body mass index; SBP, systolic blood pressure; DBP, diastolic blood pressure; Cr, creatinine; eGFR, estimated glomerular filtration rate; LDL, low density lipoprotein; CRP, C-reactive protein.
