# Supplementary material for: Circulating renalase predicts all-cause mortality and renal outcomes in patients with advanced chronic kidney disease
Source: PubMed Central journal article supplement — Korean J Intern Med. 2017 Nov 29;34(4):858–66. doi: 10.3904/kjim.2017.058 (PMC6610203; doi:10.3904/kjim.2017.058), 2017-11-29
Supplement: kjim-2017-058-suppl3.pdf [file kjim-2017-058-suppl3.pdf]

**Supplementary Table 3. Baseline characteristics of patients according to the occurrence of renal outcomes in 322 patients**

| Variable                         | No renal outcome (n = 185) | Renal outcome (n = 137) | p value |
|----------------------------------|----------------------------|-------------------------|---------|
| Age, yr                          | 57.6 ± 13.3                | 54.1 ± 12.7             | 0.016   |
| Male sex                         | 121 (65.4)                 | 90 (65.7)               | 1.000   |
| ESRD cause                       |                            |                         |         |
| Diabetic                         | 80 (43.2)                  | 82 (59.9)               | 0.003   |
| BMI, kg/m <sup>2</sup>           | 24.8 ± 3.7                 | 24.3 ± 3.4              | 0.242   |
| SBP, mmHg                        | 128.5 ± 15.0               | 130.6 ± 14.0            | 0.212   |
| DBP, mmHg                        | 75.1 ± 9.6                 | 76.2 ± 9.9              | 0.292   |
| Serum Cr, mg/dL                  | 2.60 ± 0.55                | 3.03 ± 0.69             | < 0.001 |
| eGFR, mL/min/1.73 m <sup>2</sup> | 28.29 ± 7.26               | 25.21 ± 5.95            | < 0.001 |
| Urinary protein, g/g Cr          | 1.27 ± 1.54                | 3.18 ± 2.21             | < 0.001 |
| Hemoglobin, g/dL                 | 11.8 ± 1.8                 | 10.9 ± 1.5              | < 0.001 |
| Albumin, g/dL                    | 4.1 ± 0.4                  | 3.8 ± 0.5               | < 0.001 |
| Uric acid, mg/dL                 | 8.3 ± 1.8                  | 8.3 ± 1.8               | 0.749   |
| LDL, mg/dL                       | 91.6 ± 26.0                | 93.1 ± 33.3             | 0.677   |
| CRP, mg/dL                       | 0.69 ± 2.65                | 0.61 ± 3.09             | 0.823   |
| Calcium, mg/dL                   | 9.00 ± 0.55                | 8.72 ± 0.59             | < 0.001 |
| Phosphorous, mg/dL               | 3.75 ± 0.70                | 4.10 ± 0.69             | < 0.001 |
| Renalase, µg/mL                  | 69.6 ± 31.8                | 84.0 ± 35.8             | < 0.001 |
| Follow-up period, mon            | 32.4 ± 4.2                 | 21.5 ± 8.5              | < 0.001 |

Values are presented as mean ± SD or number (%).

ESRD, end stage renal disease; BMI, body mass index; SBP, systolic blood pressure; DBP, diastolic blood pressure; Cr, creatinine; eGFR, estimated glomerular filtration rate; LDL, low density lipoprotein; CRP, C-reactive protein.
